# Supplementary material for: The new threading system 2-benzyl-5,6-dimethyl-1H-benzo[d]imidazolium – dibenzo-24-crown-8: a model for Monte Carlo calculations incorporating an anion for the first time in threaded structures
Source: Royal Society of Chemistry journal article supplement (doi:10.1039/c4ra00225c), 2014-01-01
Supplement: c4ra00225c1.pdf [file c4ra00225c1.pdf]

# **The new threading system 2-benzyl-5, 6-dimethyl-1*H*-benzo[d]imidazolium - dibenzo-24-crown-8: A model for Monte Carlo calculations incorporating anion for the first time in threaded structures**

Sabari Ghosh, Tandrima Chaudhuri and Chhanda Mukhopadhyay\*

## **Supporting Information**

### **Index**

|                                             |          |
|---------------------------------------------|----------|
| <b>1. Copies of NMR spectra .....</b>       | <b>2</b> |
| <b>2. Details of DFT calculations .....</b> | <b>3</b> |

## 1. Copies of NMR spectra

### $^1\text{H}$ NMR of $[1.\text{BF}_4]\text{DB24C8}$ in $\text{CDCl}_3$

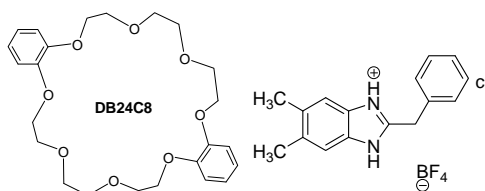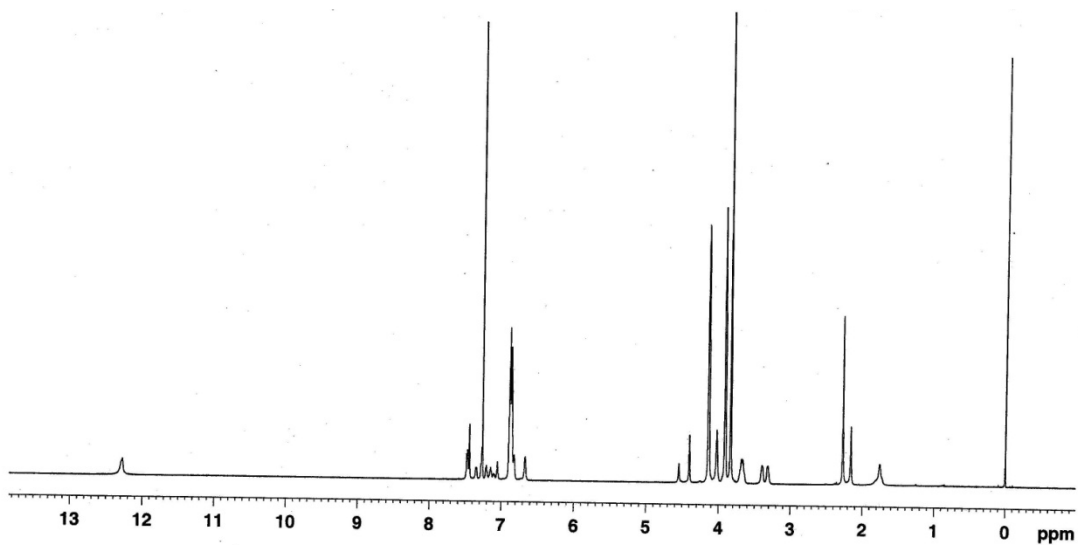

### $^1\text{H}$ NMR of $1.\text{BF}_4$ salt in $\text{CDCl}_3$

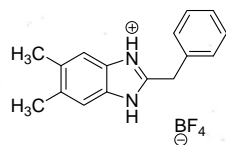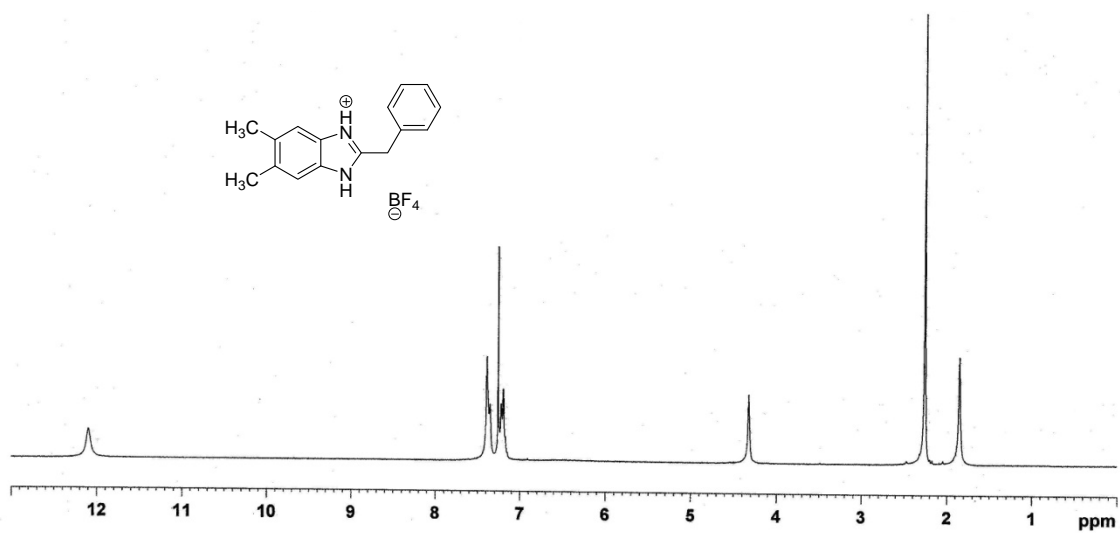

## $^{13}\text{C}$ NMR of 1.BF<sub>4</sub> salt in CDCl<sub>3</sub>

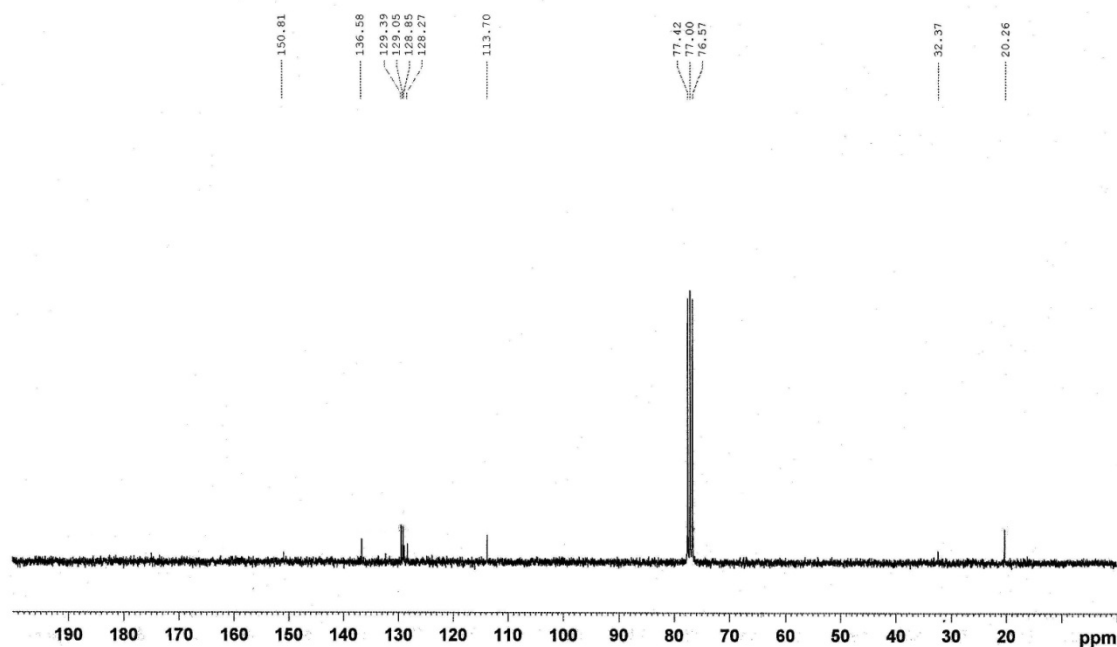

## 2. Details of DFT calculations

### Coordinates of Case A

| Center Number | Atomic Number | Atomic Type | Coordinates (Angstroms) |           |           |
|---------------|---------------|-------------|-------------------------|-----------|-----------|
|               |               |             | X                       | Y         | Z         |
| 1             | 8             | 0           | 2.718273                | -1.213037 | 1.705145  |
| 2             | 8             | 0           | 1.261355                | 0.263235  | 3.747363  |
| 3             | 8             | 0           | -1.594209               | 0.255084  | 3.514182  |
| 4             | 8             | 0           | -3.339841               | -0.073939 | 1.073671  |
| 5             | 6             | 0           | 3.619219                | -1.596906 | 0.743751  |
| 6             | 6             | 0           | 4.136694                | -0.701757 | -0.208245 |
| 7             | 6             | 0           | 5.043297                | -1.188812 | -1.152769 |
| 8             | 6             | 0           | 5.401348                | -2.542071 | -1.162567 |
| 9             | 6             | 0           | 4.851085                | -3.423821 | -0.236172 |
| 10            | 6             | 0           | 3.953291                | -2.952470 | 0.715685  |
| 11            | 6             | 0           | 3.351718                | -0.430612 | 2.731007  |
| 12            | 6             | 0           | 2.470773                | -0.473704 | 3.980375  |

|    |   |   |           |           |           |
|----|---|---|-----------|-----------|-----------|
| 13 | 6 | 0 | 0.393622  | 0.214693  | 4.886415  |
| 14 | 6 | 0 | -0.902929 | 0.957320  | 4.562707  |
| 15 | 6 | 0 | -2.911321 | 0.796921  | 3.303782  |
| 16 | 6 | 0 | -3.730910 | -0.171716 | 2.448316  |
| 17 | 8 | 0 | -2.744614 | 0.192524  | -1.515915 |
| 18 | 8 | 0 | -0.510011 | 1.560484  | -3.119460 |
| 19 | 8 | 0 | 2.236008  | 2.041826  | -2.240992 |
| 20 | 8 | 0 | 3.671440  | 0.583796  | -0.149472 |
| 21 | 6 | 0 | -3.583203 | -0.844136 | -1.163713 |
| 22 | 6 | 0 | -3.916941 | -0.971715 | 0.201241  |
| 23 | 6 | 0 | -4.788243 | -1.997455 | 0.598126  |
| 24 | 6 | 0 | -5.299556 | -2.903567 | -0.333003 |
| 25 | 6 | 0 | -4.946810 | -2.795558 | -1.671335 |
| 26 | 6 | 0 | -4.093470 | -1.771886 | -2.085163 |
| 27 | 6 | 0 | -2.697647 | 0.510043  | -2.914672 |
| 28 | 6 | 0 | -1.924082 | 1.808727  | -3.144464 |
| 29 | 6 | 0 | 0.224353  | 2.760046  | -3.398108 |
| 30 | 6 | 0 | 1.707707  | 2.418928  | -3.525406 |
| 31 | 6 | 0 | 3.617807  | 1.656178  | -2.359651 |
| 32 | 6 | 0 | 4.270024  | 1.583891  | -0.976758 |
| 33 | 1 | 0 | 5.488948  | -0.553311 | -1.909733 |
| 34 | 1 | 0 | 6.107254  | -2.910167 | -1.904700 |
| 35 | 1 | 0 | 5.124370  | -4.476717 | -0.254337 |
| 36 | 1 | 0 | 3.518646  | -3.636321 | 1.439616  |
| 37 | 1 | 0 | 3.451654  | 0.605101  | 2.388389  |
| 38 | 1 | 0 | 4.340318  | -0.839441 | 2.976695  |
| 39 | 1 | 0 | 2.215785  | -1.512029 | 4.221393  |
| 40 | 1 | 0 | 3.004292  | -0.019780 | 4.821942  |
| 41 | 1 | 0 | 0.891538  | 0.686899  | 5.739947  |
| 42 | 1 | 0 | 0.171313  | -0.832169 | 5.120210  |
| 43 | 1 | 0 | -1.529343 | 0.992981  | 5.460592  |
| 44 | 1 | 0 | -0.691825 | 1.974015  | 4.217636  |
| 45 | 1 | 0 | -2.816137 | 1.774067  | 2.821134  |
| 46 | 1 | 0 | -3.410489 | 0.912743  | 4.272284  |
| 47 | 1 | 0 | -3.549573 | -1.186966 | 2.820456  |
| 48 | 1 | 0 | -4.791492 | 0.090726  | 2.533620  |
| 49 | 1 | 0 | -5.096413 | -2.129335 | 1.629696  |
| 50 | 1 | 0 | -5.973012 | -3.694535 | -0.010582 |
| 51 | 1 | 0 | -5.340237 | -3.503667 | -2.396426 |
| 52 | 1 | 0 | -3.842963 | -1.734347 | -3.139990 |
| 53 | 1 | 0 | -2.199486 | -0.301016 | -3.458008 |
| 54 | 1 | 0 | -3.719260 | 0.656282  | -3.285119 |
| 55 | 1 | 0 | -2.177242 | 2.549952  | -2.382535 |
| 56 | 1 | 0 | -2.184519 | 2.201351  | -4.133099 |
| 57 | 1 | 0 | -0.128288 | 3.193744  | -4.340748 |

|    |   |   |           |           |           |
|----|---|---|-----------|-----------|-----------|
| 58 | 1 | 0 | 0.063291  | 3.471076  | -2.582521 |
| 59 | 1 | 0 | 2.252830  | 3.296031  | -3.888845 |
| 60 | 1 | 0 | 1.841253  | 1.583096  | -4.221740 |
| 61 | 1 | 0 | 3.651697  | 0.687571  | -2.867418 |
| 62 | 1 | 0 | 4.155542  | 2.397972  | -2.961976 |
| 63 | 1 | 0 | 4.097431  | 2.535094  | -0.461818 |
| 64 | 1 | 0 | 5.357416  | 1.459510  | -1.040118 |
| 65 | 6 | 0 | -1.728674 | 5.476086  | -0.170905 |
| 66 | 6 | 0 | -2.300239 | 4.219932  | 0.015712  |
| 67 | 6 | 0 | -1.505170 | 3.136814  | 0.393928  |
| 68 | 6 | 0 | -0.127032 | 3.297673  | 0.589810  |
| 69 | 6 | 0 | 0.433616  | 4.570907  | 0.411974  |
| 70 | 6 | 0 | -0.362125 | 5.652349  | 0.027297  |
| 71 | 6 | 0 | 0.412503  | 0.809467  | 0.532144  |
| 72 | 7 | 0 | -0.169536 | -0.202914 | 1.186151  |
| 73 | 6 | 0 | -0.259291 | -1.317564 | 0.387352  |
| 74 | 6 | 0 | 0.269156  | -0.946714 | -0.843138 |
| 75 | 7 | 0 | 0.650755  | 0.364112  | -0.707652 |
| 76 | 6 | 0 | -0.755340 | -2.587236 | 0.638804  |
| 77 | 6 | 0 | -0.708433 | -3.495715 | -0.439846 |
| 78 | 6 | 0 | -0.165209 | -3.113685 | -1.706964 |
| 79 | 6 | 0 | 0.338926  | -1.813792 | -1.921276 |
| 80 | 6 | 0 | 0.741558  | 2.167641  | 1.070513  |
| 81 | 6 | 0 | -1.265897 | -4.882024 | -0.227615 |
| 82 | 6 | 0 | -0.127395 | -4.092576 | -2.854020 |
| 83 | 1 | 0 | -1.981917 | 2.167186  | 0.525359  |
| 84 | 1 | 0 | 0.082829  | 6.635160  | -0.107804 |
| 85 | 1 | 0 | -0.479128 | -0.145142 | 2.158651  |
| 86 | 1 | 0 | 1.063976  | 0.944064  | -1.438797 |
| 87 | 1 | 0 | -1.165551 | -2.834768 | 1.607883  |
| 88 | 1 | 0 | 0.752368  | -1.482565 | -2.864869 |
| 89 | 1 | 0 | 0.676010  | 2.100125  | 2.157367  |
| 90 | 1 | 0 | 1.787418  | 2.328021  | 0.792483  |
| 91 | 1 | 0 | 0.330657  | -3.648411 | -3.744078 |
| 92 | 1 | 0 | 0.465394  | -4.972665 | -2.583077 |
| 93 | 1 | 0 | -1.142094 | -4.400799 | -3.122712 |
| 94 | 1 | 0 | -1.635387 | -5.013331 | 0.794707  |
| 95 | 1 | 0 | -2.104965 | -5.060758 | -0.907681 |
| 96 | 1 | 0 | -0.487842 | -5.633132 | -0.395847 |
| 97 | 1 | 0 | -3.368188 | 4.081788  | -0.133655 |
| 98 | 1 | 0 | -2.349777 | 6.319207  | -0.463681 |
| 99 | 1 | 0 | 1.496464  | 4.736694  | 0.577304  |

---

Coordinates of Case B

| Center Number | Atomic Number | Atomic Type | Coordinates (Angstroms) |           |           |
|---------------|---------------|-------------|-------------------------|-----------|-----------|
|               |               |             | X                       | Y         | Z         |
| 1             | 8             | 0           | -0.977530               | -3.469865 | 0.130908  |
| 2             | 8             | 0           | -1.979122               | -2.530517 | 2.663004  |
| 3             | 8             | 0           | -1.362136               | 0.331244  | 3.005888  |
| 4             | 8             | 0           | -0.392894               | 2.778492  | 1.564463  |
| 5             | 6             | 0           | -1.090287               | -3.266787 | -1.221704 |
| 6             | 6             | 0           | 0.097353                | -3.360218 | -1.973929 |
| 7             | 6             | 0           | 0.051790                | -3.168486 | -3.356894 |
| 8             | 6             | 0           | -1.154752               | -2.843621 | -3.981804 |
| 9             | 6             | 0           | -2.316772               | -2.700790 | -3.228427 |
| 10            | 6             | 0           | -2.286029               | -2.910232 | -1.850233 |
| 11            | 6             | 0           | -2.104369               | -4.057772 | 0.796635  |
| 12            | 6             | 0           | -2.848262               | -3.020248 | 1.634481  |
| 13            | 6             | 0           | -2.663846               | -1.638351 | 3.550197  |
| 14            | 6             | 0           | -1.676418               | -0.589624 | 4.065097  |
| 15            | 6             | 0           | -1.607116               | 1.689360  | 3.390810  |
| 16            | 6             | 0           | -1.680483               | 2.616926  | 2.177329  |
| 17            | 8             | 0           | 1.915147                | 2.933338  | 0.242539  |
| 18            | 8             | 0           | 4.004999                | 0.872012  | -0.746743 |
| 19            | 8             | 0           | 3.647595                | -1.991418 | -1.225690 |
| 20            | 8             | 0           | 1.239666                | -3.588581 | -1.252444 |
| 21            | 6             | 0           | 0.900227                | 3.768614  | -0.170862 |
| 22            | 6             | 0           | -0.335608               | 3.652678  | 0.498371  |
| 23            | 6             | 0           | -1.425133               | 4.421565  | 0.057996  |
| 24            | 6             | 0           | -1.290735               | 5.313132  | -1.006537 |
| 25            | 6             | 0           | -0.066098               | 5.451331  | -1.642725 |
| 26            | 6             | 0           | 1.023814                | 4.683544  | -1.228592 |
| 27            | 6             | 0           | 3.197086                | 3.122900  | -0.364473 |
| 28            | 6             | 0           | 4.165316                | 2.030451  | 0.088410  |
| 29            | 6             | 0           | 4.988432                | -0.127417 | -0.452454 |
| 30            | 6             | 0           | 4.849843                | -1.247223 | -1.481310 |
| 31            | 6             | 0           | 3.303150                | -2.816761 | -2.351439 |
| 32            | 6             | 0           | 2.429120                | -3.998058 | -1.920373 |
| 33            | 1             | 0           | 0.935222                | -3.242244 | -3.979248 |
| 34            | 1             | 0           | -1.187024               | -2.678275 | -5.055756 |
| 35            | 1             | 0           | -3.250992               | -2.413107 | -3.704746 |
| 36            | 1             | 0           | -3.200636               | -2.748579 | -1.285435 |
| 37            | 1             | 0           | -1.689316               | -4.821093 | 1.464718  |
| 38            | 1             | 0           | -2.778686               | -4.575746 | 0.105786  |
| 39            | 1             | 0           | -3.150282               | -2.182790 | 1.006228  |
| 40            | 1             | 0           | -3.731232               | -3.478867 | 2.093227  |
| 41            | 1             | 0           | -3.046276               | -2.234047 | 4.384968  |
| 42            | 1             | 0           | -3.503485               | -1.146455 | 3.052049  |
| 43            | 1             | 0           | -2.102830               | -0.077156 | 4.935188  |
| 44            | 1             | 0           | -0.737400               | -1.062956 | 4.371371  |
| 45            | 1             | 0           | -0.801200               | 2.002439  | 4.064568  |

|    |   |   |           |           |           |
|----|---|---|-----------|-----------|-----------|
| 46 | 1 | 0 | -2.567602 | 1.753148  | 3.916420  |
| 47 | 1 | 0 | -2.381734 | 2.207209  | 1.444968  |
| 48 | 1 | 0 | -2.032787 | 3.590718  | 2.540599  |
| 49 | 1 | 0 | -2.406902 | 4.345081  | 0.516443  |
| 50 | 1 | 0 | -2.148592 | 5.896934  | -1.333165 |
| 51 | 1 | 0 | 0.040204  | 6.149544  | -2.469034 |
| 52 | 1 | 0 | 1.953616  | 4.823168  | -1.766706 |
| 53 | 1 | 0 | 3.116634  | 3.073761  | -1.456774 |
| 54 | 1 | 0 | 3.587202  | 4.097105  | -0.048405 |
| 55 | 1 | 0 | 3.994400  | 1.753223  | 1.129759  |
| 56 | 1 | 0 | 5.190527  | 2.398810  | -0.030244 |
| 57 | 1 | 0 | 5.989621  | 0.311612  | -0.527421 |
| 58 | 1 | 0 | 4.822405  | -0.505336 | 0.560130  |
| 59 | 1 | 0 | 5.700078  | -1.932503 | -1.407009 |
| 60 | 1 | 0 | 4.806394  | -0.818268 | -2.489198 |
| 61 | 1 | 0 | 2.782436  | -2.179297 | -3.070519 |
| 62 | 1 | 0 | 4.211813  | -3.211087 | -2.822197 |
| 63 | 1 | 0 | 2.990951  | -4.585900 | -1.185386 |
| 64 | 1 | 0 | 2.215317  | -4.671945 | -2.758603 |
| 65 | 6 | 0 | 4.200681  | 0.163291  | 4.185703  |
| 66 | 6 | 0 | 3.111632  | 0.926990  | 3.773165  |
| 67 | 6 | 0 | 2.137591  | 0.366638  | 2.945267  |
| 68 | 6 | 0 | 2.242459  | -0.963623 | 2.518218  |
| 69 | 6 | 0 | 3.335853  | -1.726884 | 2.953360  |
| 70 | 6 | 0 | 4.313216  | -1.163151 | 3.776837  |
| 71 | 6 | 0 | 0.653988  | -0.785924 | 0.539772  |
| 72 | 7 | 0 | -0.565432 | -0.258387 | 0.380069  |
| 73 | 6 | 0 | -0.682845 | 0.355393  | -0.845193 |
| 74 | 6 | 0 | 0.567748  | 0.250751  | -1.439466 |
| 75 | 7 | 0 | 1.350043  | -0.449999 | -0.556395 |
| 76 | 6 | 0 | -1.745405 | 0.988899  | -1.467928 |
| 77 | 6 | 0 | -1.491011 | 1.538309  | -2.742200 |
| 78 | 6 | 0 | -0.201141 | 1.435522  | -3.346716 |
| 79 | 6 | 0 | 0.857521  | 0.778931  | -2.688233 |
| 80 | 6 | 0 | 1.163333  | -1.604343 | 1.685404  |
| 81 | 6 | 0 | -2.625985 | 2.240230  | -3.442586 |
| 82 | 6 | 0 | 0.059831  | 2.041266  | -4.702137 |
| 83 | 1 | 0 | 1.292793  | 0.982953  | 2.639743  |
| 84 | 1 | 0 | 5.154514  | -1.765216 | 4.110763  |
| 85 | 1 | 0 | -1.305809 | -0.303212 | 1.087547  |
| 86 | 1 | 0 | 2.323576  | -0.712594 | -0.699397 |
| 87 | 1 | 0 | -2.711324 | 1.051286  | -0.981859 |
| 88 | 1 | 0 | 1.850749  | 0.683345  | -3.103612 |
| 89 | 1 | 0 | 0.309208  | -1.847336 | 2.312633  |
| 90 | 1 | 0 | 1.525883  | -2.526240 | 1.221343  |
| 91 | 1 | 0 | 1.085263  | 1.849703  | -5.034828 |
| 92 | 1 | 0 | -0.613717 | 1.609899  | -5.448563 |
| 93 | 1 | 0 | -0.078446 | 3.126516  | -4.664479 |
| 94 | 1 | 0 | -3.533506 | 2.251550  | -2.829302 |
| 95 | 1 | 0 | -2.358793 | 3.281061  | -3.651830 |
| 96 | 1 | 0 | -2.867255 | 1.727640  | -4.379216 |
| 97 | 1 | 0 | 3.011917  | 1.960387  | 4.096047  |

|     |   |   |           |           |           |
|-----|---|---|-----------|-----------|-----------|
| 98  | 1 | 0 | 4.955361  | 0.599886  | 4.835113  |
| 99  | 1 | 0 | 3.428935  | -2.770440 | 2.660706  |
| 100 | 5 | 0 | -4.565840 | 0.101976  | 0.577526  |
| 101 | 9 | 0 | -4.481582 | -0.608505 | -0.418089 |
| 102 | 9 | 0 | -5.353231 | -0.385038 | 1.358302  |
| 103 | 9 | 0 | -3.521933 | 0.182977  | 1.086803  |
| 104 | 9 | 0 | -4.939277 | 1.216303  | 0.255078  |

---
