# Supplementary material for: The new threading system 2-benzyl-5,6-dimethyl-1H-benzo[d]imidazolium – dibenzo-24-crown-8: a model for Monte Carlo calculations incorporating an anion for the first time in threaded structures
Source: Royal Society of Chemistry journal article supplement (doi:10.1039/c4ra00225c), 2014-01-01
Supplement: c4ra00225c2.pdf [file c4ra00225c2.pdf]

Supporting Information II  
Coordinates of [1.PF6] DB24C8

| Center<br>Number | Atomic<br>Number | Atomic<br>Type | Coordinates (Angstroms) |           |           |
|------------------|------------------|----------------|-------------------------|-----------|-----------|
|                  |                  |                | X                       | Y         | Z         |
| 1                | 8                | 0              | -2.189247               | -3.365430 | -1.030626 |
| 2                | 8                | 0              | -4.333610               | -1.458249 | -0.764266 |
| 3                | 8                | 0              | -4.242489               | 1.452130  | -0.367558 |
| 4                | 8                | 0              | -1.786070               | 3.158528  | 0.357173  |
| 5                | 6                | 0              | -1.136468               | -3.352924 | -1.906770 |
| 6                | 6                | 0              | 0.142884                | -3.435757 | -1.323395 |
| 7                | 6                | 0              | 1.284229                | -3.310781 | -2.119065 |
| 8                | 6                | 0              | 1.158659                | -3.155098 | -3.499174 |
| 9                | 6                | 0              | -0.103516               | -3.118555 | -4.084823 |
| 10               | 6                | 0              | -1.250277               | -3.213567 | -3.292280 |
| 11               | 6                | 0              | -3.502622               | -3.634528 | -1.511742 |
| 12               | 6                | 0              | -4.263299               | -2.359041 | -1.882705 |
| 13               | 6                | 0              | -5.442025               | -0.554373 | -0.903972 |
| 14               | 6                | 0              | -5.299990               | 0.598109  | 0.086793  |
| 15               | 6                | 0              | -4.154787               | 2.646778  | 0.423499  |
| 16               | 6                | 0              | -3.066403               | 3.555925  | -0.144876 |
| 17               | 8                | 0              | 0.559894                | 2.621123  | 1.489035  |
| 18               | 8                | 0              | 1.574366                | 0.087764  | 2.827243  |
| 19               | 8                | 0              | 1.663879                | -2.807503 | 2.380496  |
| 20               | 8                | 0              | 0.187548                | -3.564128 | 0.040893  |
| 21               | 6                | 0              | 0.560251                | 3.515367  | 0.437805  |
| 22               | 6                | 0              | -0.688388               | 3.825502  | -0.139557 |
| 23               | 6                | 0              | -0.746660               | 4.754923  | -1.189642 |
| 24               | 6                | 0              | 0.415399                | 5.350365  | -1.684163 |
| 25               | 6                | 0              | 1.647909                | 5.021919  | -1.136018 |
| 26               | 6                | 0              | 1.719728                | 4.111353  | -0.081577 |
| 27               | 6                | 0              | 1.829228                | 2.394117  | 2.116269  |
| 28               | 6                | 0              | 1.692898                | 1.434948  | 3.300224  |
| 29               | 6                | 0              | 1.958368                | -0.876320 | 3.821755  |
| 30               | 6                | 0              | 2.630434                | -2.066119 | 3.134908  |
| 31               | 6                | 0              | 2.281348                | -3.496106 | 1.285442  |
| 32               | 6                | 0              | 1.243361                | -4.368593 | 0.583282  |
| 33               | 1                | 0              | 2.280398                | -3.296931 | -1.685505 |
| 34               | 1                | 0              | 2.051289                | -3.050750 | -4.111593 |
| 35               | 1                | 0              | -0.194081               | -2.995771 | -5.161449 |
| 36               | 1                | 0              | -2.211468               | -3.152054 | -3.787312 |
| 37               | 1                | 0              | -4.027465               | -4.114988 | -0.678249 |
| 38               | 1                | 0              | -3.497452               | -4.358705 | -2.334881 |
| 39               | 1                | 0              | -3.767840               | -1.825141 | -2.697496 |
| 40               | 1                | 0              | -5.272896               | -2.638964 | -2.205936 |
| 41               | 1                | 0              | -6.363884               | -1.109849 | -0.700643 |
| 42               | 1                | 0              | -5.464336               | -0.161057 | -1.927214 |

|    |   |   |           |           |           |
|----|---|---|-----------|-----------|-----------|
| 43 | 1 | 0 | -6.235784 | 1.164590  | 0.120849  |
| 44 | 1 | 0 | -5.053627 | 0.225422  | 1.085659  |
| 45 | 1 | 0 | -3.944915 | 2.382402  | 1.463038  |
| 46 | 1 | 0 | -5.116992 | 3.167098  | 0.364397  |
| 47 | 1 | 0 | -3.089350 | 3.479134  | -1.238283 |
| 48 | 1 | 0 | -3.260816 | 4.585661  | 0.175648  |
| 49 | 1 | 0 | -1.681050 | 5.035724  | -1.660732 |
| 50 | 1 | 0 | 0.357992  | 6.060815  | -2.504263 |
| 51 | 1 | 0 | 2.559495  | 5.467512  | -1.527127 |
| 52 | 1 | 0 | 2.709662  | 3.876108  | 0.300353  |
| 53 | 1 | 0 | 2.523319  | 1.958985  | 1.391451  |
| 54 | 1 | 0 | 2.212492  | 3.347042  | 2.499795  |
| 55 | 1 | 0 | 0.813908  | 1.670040  | 3.906714  |
| 56 | 1 | 0 | 2.596310  | 1.536402  | 3.912103  |
| 57 | 1 | 0 | 2.663982  | -0.447534 | 4.541022  |
| 58 | 1 | 0 | 1.052242  | -1.186930 | 4.352419  |
| 59 | 1 | 0 | 3.058336  | -2.739492 | 3.884492  |
| 60 | 1 | 0 | 3.431201  | -1.702748 | 2.486372  |
| 61 | 1 | 0 | 2.680222  | -2.756671 | 0.587068  |
| 62 | 1 | 0 | 3.095702  | -4.123855 | 1.663047  |
| 63 | 1 | 0 | 0.770366  | -5.023532 | 1.323662  |
| 64 | 1 | 0 | 1.708348  | -5.018255 | -0.167340 |
| 65 | 6 | 0 | -4.203276 | 0.514390  | 4.449218  |
| 66 | 6 | 0 | -3.106127 | 1.225723  | 3.968518  |
| 67 | 6 | 0 | -2.191689 | 0.608956  | 3.112545  |
| 68 | 6 | 0 | -2.363920 | -0.727739 | 2.731086  |
| 69 | 6 | 0 | -3.467426 | -1.436888 | 3.229669  |
| 70 | 6 | 0 | -4.384400 | -0.816246 | 4.079515  |
| 71 | 6 | 0 | -0.943408 | -0.698053 | 0.624645  |
| 72 | 7 | 0 | -1.768718 | -0.325989 | -0.364410 |
| 73 | 6 | 0 | -1.078094 | 0.282892  | -1.379515 |
| 74 | 6 | 0 | 0.256149  | 0.278214  | -0.992682 |
| 75 | 7 | 0 | 0.282144  | -0.305679 | 0.253997  |
| 76 | 6 | 0 | -1.513044 | 0.815266  | -2.584303 |
| 77 | 6 | 0 | -0.516709 | 1.360549  | -3.419067 |
| 78 | 6 | 0 | 0.856320  | 1.352150  | -3.026326 |
| 79 | 6 | 0 | 1.259692  | 0.799593  | -1.792998 |
| 80 | 6 | 0 | -1.343530 | -1.426010 | 1.870614  |
| 81 | 6 | 0 | -0.935596 | 1.969521  | -4.732853 |
| 82 | 6 | 0 | 1.922156  | 1.944244  | -3.913458 |
| 83 | 1 | 0 | -1.340788 | 1.182889  | 2.749049  |
| 84 | 1 | 0 | -5.231752 | -1.376386 | 4.464786  |
| 85 | 1 | 0 | -2.772955 | -0.506548 | -0.353205 |
| 86 | 1 | 0 | 1.126698  | -0.416745 | 0.828315  |
| 87 | 1 | 0 | -2.564268 | 0.808070  | -2.834369 |
| 88 | 1 | 0 | 2.290521  | 0.783623  | -1.465096 |
| 89 | 1 | 0 | -1.722591 | -2.389360 | 1.517758  |
| 90 | 1 | 0 | -0.439690 | -1.597567 | 2.448232  |

|     |    |   |           |           |           |
|-----|----|---|-----------|-----------|-----------|
| 91  | 1  | 0 | 2.913465  | 1.876072  | -3.451585 |
| 92  | 1  | 0 | 1.963819  | 1.406378  | -4.866110 |
| 93  | 1  | 0 | 1.718816  | 3.003890  | -4.097255 |
| 94  | 1  | 0 | -2.013165 | 1.863549  | -4.897232 |
| 95  | 1  | 0 | -0.701338 | 3.039387  | -4.745368 |
| 96  | 1  | 0 | -0.426196 | 1.471717  | -5.563801 |
| 97  | 1  | 0 | -2.954653 | 2.261925  | 4.260436  |
| 98  | 1  | 0 | -4.910438 | 0.994977  | 5.120557  |
| 99  | 1  | 0 | -3.612998 | -2.483017 | 2.966728  |
| 100 | 15 | 0 | 4.602355  | -0.096044 | 0.180866  |
| 101 | 9  | 0 | 3.011938  | -0.382360 | 0.450084  |
| 102 | 9  | 0 | 4.775819  | 0.361992  | 1.745466  |
| 103 | 9  | 0 | 4.250955  | 1.452049  | -0.228749 |
| 104 | 9  | 0 | 4.945444  | -1.645746 | 0.588171  |
| 105 | 9  | 0 | 4.408520  | -0.553948 | -1.381093 |
| 106 | 9  | 0 | 6.190279  | 0.191043  | -0.089445 |

-----

Coordinates of [1.C1O4]DB24C8

-----

| Center<br>Number | Atomic<br>Number | Atomic<br>Type | Coordinates (Angstroms) |           |           |
|------------------|------------------|----------------|-------------------------|-----------|-----------|
|                  |                  |                | X                       | Y         | Z         |
| 1                | 8                | 0              | -3.006597               | 2.410157  | 1.116062  |
| 2                | 8                | 0              | -4.416183               | 0.287386  | -0.214184 |
| 3                | 8                | 0              | -3.624120               | -2.384228 | 0.490143  |
| 4                | 8                | 0              | -0.701344               | -3.350061 | 0.629687  |
| 5                | 6                | 0              | -2.222114               | 3.495531  | 1.405023  |
| 6                | 6                | 0              | -1.321637               | 4.081351  | 0.499649  |
| 7                | 6                | 0              | -0.542219               | 5.156488  | 0.940997  |
| 8                | 6                | 0              | -0.652044               | 5.630824  | 2.253670  |
| 9                | 6                | 0              | -1.531848               | 5.027118  | 3.145864  |
| 10               | 6                | 0              | -2.309011               | 3.952624  | 2.724479  |
| 11               | 6                | 0              | -3.941984               | 2.652348  | 0.057735  |
| 12               | 6                | 0              | -5.004064               | 1.555498  | 0.126709  |
| 13               | 6                | 0              | -5.357147               | -0.779000 | -0.013798 |
| 14               | 6                | 0              | -4.716693               | -2.112022 | -0.396508 |
| 15               | 6                | 0              | -3.075265               | -3.687647 | 0.243161  |
| 16               | 6                | 0              | -1.888027               | -3.945222 | 1.169443  |
| 17               | 8                | 0              | 1.581134                | -2.630449 | -0.561032 |
| 18               | 8                | 0              | 2.149905                | -0.100844 | -2.153570 |
| 19               | 8                | 0              | 1.069110                | 2.599718  | -2.464240 |
| 20               | 8                | 0              | -1.228244               | 3.515178  | -0.744286 |
| 21               | 6                | 0              | 1.675083                | -3.213064 | 0.687873  |
| 22               | 6                | 0              | 0.469482                | -3.591920 | 1.314961  |
| 23               | 6                | 0              | 0.513748                | -4.163965 | 2.597390  |
| 24               | 6                | 0              | 1.730164                | -4.369565 | 3.248593  |

|    |   |   |           |           |           |
|----|---|---|-----------|-----------|-----------|
| 25 | 6 | 0 | 2.916561  | -4.005524 | 2.628560  |
| 26 | 6 | 0 | 2.890173  | -3.432482 | 1.356202  |
| 27 | 6 | 0 | 2.821636  | -2.204370 | -1.148601 |
| 28 | 6 | 0 | 2.582103  | -1.440393 | -2.452635 |
| 29 | 6 | 0 | 2.622152  | 0.845996  | -3.126715 |
| 30 | 6 | 0 | 2.463522  | 2.260804  | -2.570633 |
| 31 | 6 | 0 | 0.916348  | 3.898296  | -1.873313 |
| 32 | 6 | 0 | -0.568456 | 4.251262  | -1.783312 |
| 33 | 1 | 0 | 0.189679  | 5.639434  | 0.301639  |
| 34 | 1 | 0 | -0.029950 | 6.460309  | 2.582150  |
| 35 | 1 | 0 | -1.601384 | 5.383255  | 4.169759  |
| 36 | 1 | 0 | -2.985226 | 3.466835  | 3.422260  |
| 37 | 1 | 0 | -3.439401 | 2.596801  | -0.911454 |
| 38 | 1 | 0 | -4.419071 | 3.631297  | 0.181740  |
| 39 | 1 | 0 | -5.413462 | 1.500015  | 1.142054  |
| 40 | 1 | 0 | -5.809245 | 1.772176  | -0.583723 |
| 41 | 1 | 0 | -6.241915 | -0.602461 | -0.634498 |
| 42 | 1 | 0 | -5.643895 | -0.799115 | 1.043960  |
| 43 | 1 | 0 | -5.463584 | -2.909860 | -0.315870 |
| 44 | 1 | 0 | -4.338240 | -2.068211 | -1.420805 |
| 45 | 1 | 0 | -2.772291 | -3.769424 | -0.803525 |
| 46 | 1 | 0 | -3.856881 | -4.426295 | 0.453351  |
| 47 | 1 | 0 | -2.105786 | -3.516208 | 2.153827  |
| 48 | 1 | 0 | -1.739267 | -5.030078 | 1.241630  |
| 49 | 1 | 0 | -0.384921 | -4.455643 | 3.127888  |
| 50 | 1 | 0 | 1.750294  | -4.810689 | 4.241585  |
| 51 | 1 | 0 | 3.869205  | -4.158616 | 3.130730  |
| 52 | 1 | 0 | 3.847689  | -3.160272 | 0.919773  |
| 53 | 1 | 0 | 3.343176  | -1.542406 | -0.451401 |
| 54 | 1 | 0 | 3.424459  | -3.092806 | -1.373184 |
| 55 | 1 | 0 | 1.805877  | -1.918038 | -3.056882 |
| 56 | 1 | 0 | 3.517509  | -1.424037 | -3.022285 |
| 57 | 1 | 0 | 3.680229  | 0.670646  | -3.344464 |
| 58 | 1 | 0 | 2.031221  | 0.717074  | -4.040057 |
| 59 | 1 | 0 | 2.951868  | 2.976618  | -3.241488 |
| 60 | 1 | 0 | 2.908363  | 2.323566  | -1.573735 |
| 61 | 1 | 0 | 1.378833  | 3.891287  | -0.881066 |
| 62 | 1 | 0 | 1.421619  | 4.632558  | -2.510106 |
| 63 | 1 | 0 | -1.062685 | 3.959607  | -2.717457 |
| 64 | 1 | 0 | -0.726807 | 5.330510  | -1.673396 |
| 65 | 6 | 0 | -3.001289 | -3.000850 | -4.331865 |
| 66 | 6 | 0 | -1.901979 | -3.190226 | -3.497739 |
| 67 | 6 | 0 | -1.357734 | -2.111064 | -2.798625 |
| 68 | 6 | 0 | -1.905919 | -0.828907 | -2.927138 |
| 69 | 6 | 0 | -3.004725 | -0.647880 | -3.781390 |
| 70 | 6 | 0 | -3.552662 | -1.729677 | -4.473690 |
| 71 | 6 | 0 | -0.877056 | 0.188719  | -0.824546 |
| 72 | 7 | 0 | -1.687679 | -0.068991 | 0.209276  |

|     |    |   |           |           |           |
|-----|----|---|-----------|-----------|-----------|
| 73  | 6  | 0 | -0.981756 | -0.114917 | 1.388380  |
| 74  | 6  | 0 | 0.343445  | 0.122837  | 1.049791  |
| 75  | 7  | 0 | 0.353524  | 0.287017  | -0.309979 |
| 76  | 6  | 0 | -1.393979 | -0.344835 | 2.692400  |
| 77  | 6  | 0 | -0.379777 | -0.336926 | 3.674547  |
| 78  | 6  | 0 | 0.985572  | -0.099574 | 3.322921  |
| 79  | 6  | 0 | 1.364757  | 0.142703  | 1.985966  |
| 80  | 6  | 0 | -1.272663 | 0.361322  | -2.259393 |
| 81  | 6  | 0 | -0.768560 | -0.601140 | 5.106568  |
| 82  | 6  | 0 | 2.069877  | -0.114183 | 4.371915  |
| 83  | 1  | 0 | -0.495172 | -2.286151 | -2.156227 |
| 84  | 1  | 0 | -4.401156 | -1.577925 | -5.136861 |
| 85  | 1  | 0 | -2.698331 | -0.194453 | 0.123893  |
| 86  | 1  | 0 | 1.196080  | 0.399110  | -0.884553 |
| 87  | 1  | 0 | -2.437095 | -0.525990 | 2.910138  |
| 88  | 1  | 0 | 2.388558  | 0.318697  | 1.679305  |
| 89  | 1  | 0 | -1.950695 | 1.219137  | -2.252654 |
| 90  | 1  | 0 | -0.370208 | 0.632695  | -2.808900 |
| 91  | 1  | 0 | 3.055247  | 0.078855  | 3.934493  |
| 92  | 1  | 0 | 1.883951  | 0.661677  | 5.120805  |
| 93  | 1  | 0 | 2.112337  | -1.093786 | 4.858976  |
| 94  | 1  | 0 | -1.850722 | -0.737238 | 5.208741  |
| 95  | 1  | 0 | -0.285029 | -1.514330 | 5.467028  |
| 96  | 1  | 0 | -0.482548 | 0.242456  | 5.740957  |
| 97  | 1  | 0 | -1.459183 | -4.177112 | -3.391992 |
| 98  | 1  | 0 | -3.418528 | -3.841221 | -4.880102 |
| 99  | 1  | 0 | -3.434813 | 0.341224  | -3.924010 |
| 100 | 17 | 0 | 5.561919  | 0.799127  | -0.644576 |
| 101 | 8  | 0 | 5.582644  | -0.482897 | -1.320310 |
| 102 | 8  | 0 | 4.366933  | 0.884183  | 0.172638  |
| 103 | 8  | 0 | 6.733859  | 0.932884  | 0.194469  |
| 104 | 8  | 0 | 5.534363  | 1.859594  | -1.632960 |

---
